# Supplementary material
Source: PubMed Central journal article supplement (PMC4346148)
Supplement: NIHMS515026-supplement-2-Supplemental_text.pdf [file NIHMS515026-supplement-2-Supplemental_text.pdf]

## 1 **Online-only Materials:**

### 2 **List of elements included:**

- 3 Path analysis
- 4 CNV Slope Analysis
- 5 eTable 1
- 6 eTable 2
- 7 eReferences
- 8 eFigure Legends
- 9 eFigure 1
- 10 eFigure 2
- 11 eFigure 3
- 12 eFigure 4
- 13 eFigure 5

### 14 **Path Analysis:**

16 Structural equation modeling (SEM) (path analysis) was implemented using AMOS 7 (SPSS Inc,  
17 Chicago)<sup>1</sup>. Endogenous variables representing the same ERP potential to different stimuli were treated as covariates.  
18 Initial solutions were determined with all paths considered; least significant paths were sequentially eliminated until  
19 only significant paths remained, as determined by consideration of standardized  $\beta$  weights. Goodness of fit was  
20 determined by consideration of residual  $\chi^2$  error/df (CMIN/df) and residual mean square error (RMSEA).

21 As predicted based upon published fMRI studies, in the AX-70 version of the task, larger N2 responses to  
22 B-cues significantly predicted performance across groups ( $\beta=-.145$ ,  $p=.024$ ). Furthermore, amplitude of N2  
23 responses significantly predicted amplitudes of the subsequent CNV ( $\beta=.58$ ,  $p<.001$ ). However, the CNV did not  
24 significantly predict performance ( $d'$ -context).

25 Path analysis also revealed two other sets of relationships. First, across groups N1 amplitude also predicted  
26 performance ( $\beta=-.17$ ,  $p=.002$ ), as well as N2 amplitude to both A- ( $\beta=.25$ ,  $p=.05$ ) and B-cues ( $\beta=.25$ ,  $p=.04$ ).  
27 Second, P1 across both A- and B-cues (combined) also significantly predicted amplitude of the subsequent N2  
28 response ( $\beta=-.35$ ,  $p=.002$ ) and N1 ( $\beta=.22$ ,  $p=.033$ ) potentials. Group membership exerted a significant effect on  
29 both P1 ( $\beta=.36$ ,  $p=.013$ ), N1 (A-cue:  $\beta=-.35$ ,  $p=.02$ ; B-cue:  $\beta=-.33$ ,  $p=.03$ ), and P3 amplitude (A-cue:  $\beta=1.90$ ,  
30  $p=.012$ ; cue B:  $\beta=2.23$ ,  $p=.03$ ). No direct group effects were observed on subsequent ERP components or  $d'$ -  
31 context scores.

32 When this path analysis model was extended across task variants, significant effects of N1 to A- ( $\beta=.54$ ,  
33  $p=.013$ ) and B-cues ( $\beta=-.79$ ,  $p<.001$ ) on performance ( $d'$ -context) were again observed, although effects of N2 on  
34 performance were not significant. Group effects were observed on P1 ( $\beta=.31$ ,  $p=.048$ ), and N1 to A- ( $\beta=-.34$ ,  
35  $p=.025$ ) and B-cues ( $-.52$ ,  $p<.001$ ), but not on N2. In the AY-70 condition, N1 to AY probes significantly predicted  
36 performance ( $\beta=-.49$ ,  $p<.001$ ), but no significant effects of N2 were observed.

### 37 **CNV Slope Analysis:**

39 Linear regressions were applied to the ERP data points between 550-1200 ms after cue onset for both  
40 groups, for both cue types and across task variations (**eTable 1**). The slopes of the regression were assessed, and an  
41 ANOVA was conducted to verify if there were group differences between the slopes. There was no main effect of  
42 group across tasks ( $F_{1,35}=1.74$ ,  $p=.2$ ), although absolute amplitude was different, as shown in the manuscript.

43

44

45

46

47 **eTable 1: Slope of CNV (mV/ms)**

| Task         | Controls    |             | Patients    |             |
|--------------|-------------|-------------|-------------|-------------|
|              | Cue A       | Cue B       | Cue A       | Cue B       |
| <b>AX-70</b> | 6.53 (1.07) | 3.24 (0.98) | 5.5 (0.65)  | 2.84 (0.79) |
| <b>AY-70</b> | 4.28 (0.71) | 2.2 (1.18)  | 4.28 (0.53) | 2.2 (0.88)  |
| <b>BX-70</b> | 14.6 (1.45) | 1.74 (0.74) | 9.63 (1.09) | 1.55 (0.47) |

48

49 **eTable 2: Effect Sizes**

| d'context  | AX-70 |       | AY-70 |       | BX-70 |       |
|------------|-------|-------|-------|-------|-------|-------|
|            | cue   | probe | cue   | probe | cue   | probe |
|            | 0.83  |       | 1.33  |       | 1.45  |       |
| <b>ERP</b> |       |       |       |       |       |       |
| <b>P1</b>  | 0.69  | 0.61  | 0.65  | 0.64  | 0.64  | 0.54  |
| <b>N1</b>  | 0.71  | 0.75  | 0.79  | 0.94  | 0.92  | 0.93  |
| <b>N2</b>  | 0.7   | 0.63  | 0.83  | 0.77  | 0.85  | 0.11  |
| <b>CNV</b> | 0.51  |       | 0.28  |       | 0.83  |       |

50

51 **eReferences:**

- 52 1. Arbuckle JL. *Amos 7.0 User's Guide*. Spring House, PA: Amos Development Corporation; 2006.  
 53 2. Dias EC, Foxe JJ, Javitt DC. Changing plans: a high density electrical mapping study of cortical control.  
 54 *Cereb Cortex*. 2003;13(7):701-715.  
 55 3. Dias EC, McGinnis T, Smiley JF, Foxe JJ, Schroeder CE, Javitt DC. Changing plans: neural correlates of  
 56 executive control in monkey and human frontal cortex. *Exp Brain Res*. 2006;174(2):279-291.  
 57 4. Barch DM, Carter CS, Braver TS, Sabb FW, MacDonald A, 3rd, Noll DC, Cohen JD. Selective deficits in  
 58 prefrontal cortex function in medication-naive patients with schizophrenia. *Archives of general psychiatry*.  
 59 2001;58(3):280-288.

60 **eFigure Legends:**

61 **eFigure 1: Activity following presentation of the Cue in task variant AY-70.** The activity is presented in two  
 62 ways. The scalp voltage distributions for each component for patients (right) and controls (left) are shown plotted  
 63 over the head representation; scales are in  $\mu\text{V}/\text{step}$ , red is positive and blue is negative. The plots show ERP  
 64 waveforms recorded at the electrode highlighted over the scalp renditions, for both patients (blue) and controls (red)  
 65 and for cues A and B.

66 **eFigure 2: Activity following presentation of the Probe in task variant AY-70.** The left panel shows activity  
 67 following presentation of the valid probe (X) and the right panel shows activity following presentation of the invalid  
 68 probe (Y). Conventions are the same as in eFigure 1.

69 **eFigure 3: Activity following presentation of the Cue in task variant BX-70.** Conventions are the same as in  
 70 eFigure 1.

71 **eFigure 4: Activity following presentation of the Probe in task variant BX-70.** Conventions are the same as in  
 72 eFigure 2.

73 **eFigure 5: Path analysis results in the AX-70 task variant.** Component variables are overlaid on a schematic  
 74 brain based upon generator locations derived from source analysis<sup>2</sup>, monkey intracranial recordings<sup>3</sup> and prior fMRI  
 75 studies<sup>4</sup>. Arrows reflect significant statistical associations as shown by path analysis, with thickness of arrow

76 representing strength of connection. CMIN/DF of the model was 1.109, and RMSEA was 0.052. For statistics, P1  
77 values were collapsed across A- and B-cues, which were not significantly different ( $p > .2$ ).
