# Supplementary material
Source: PubMed Central journal article supplement (PMC4346148)

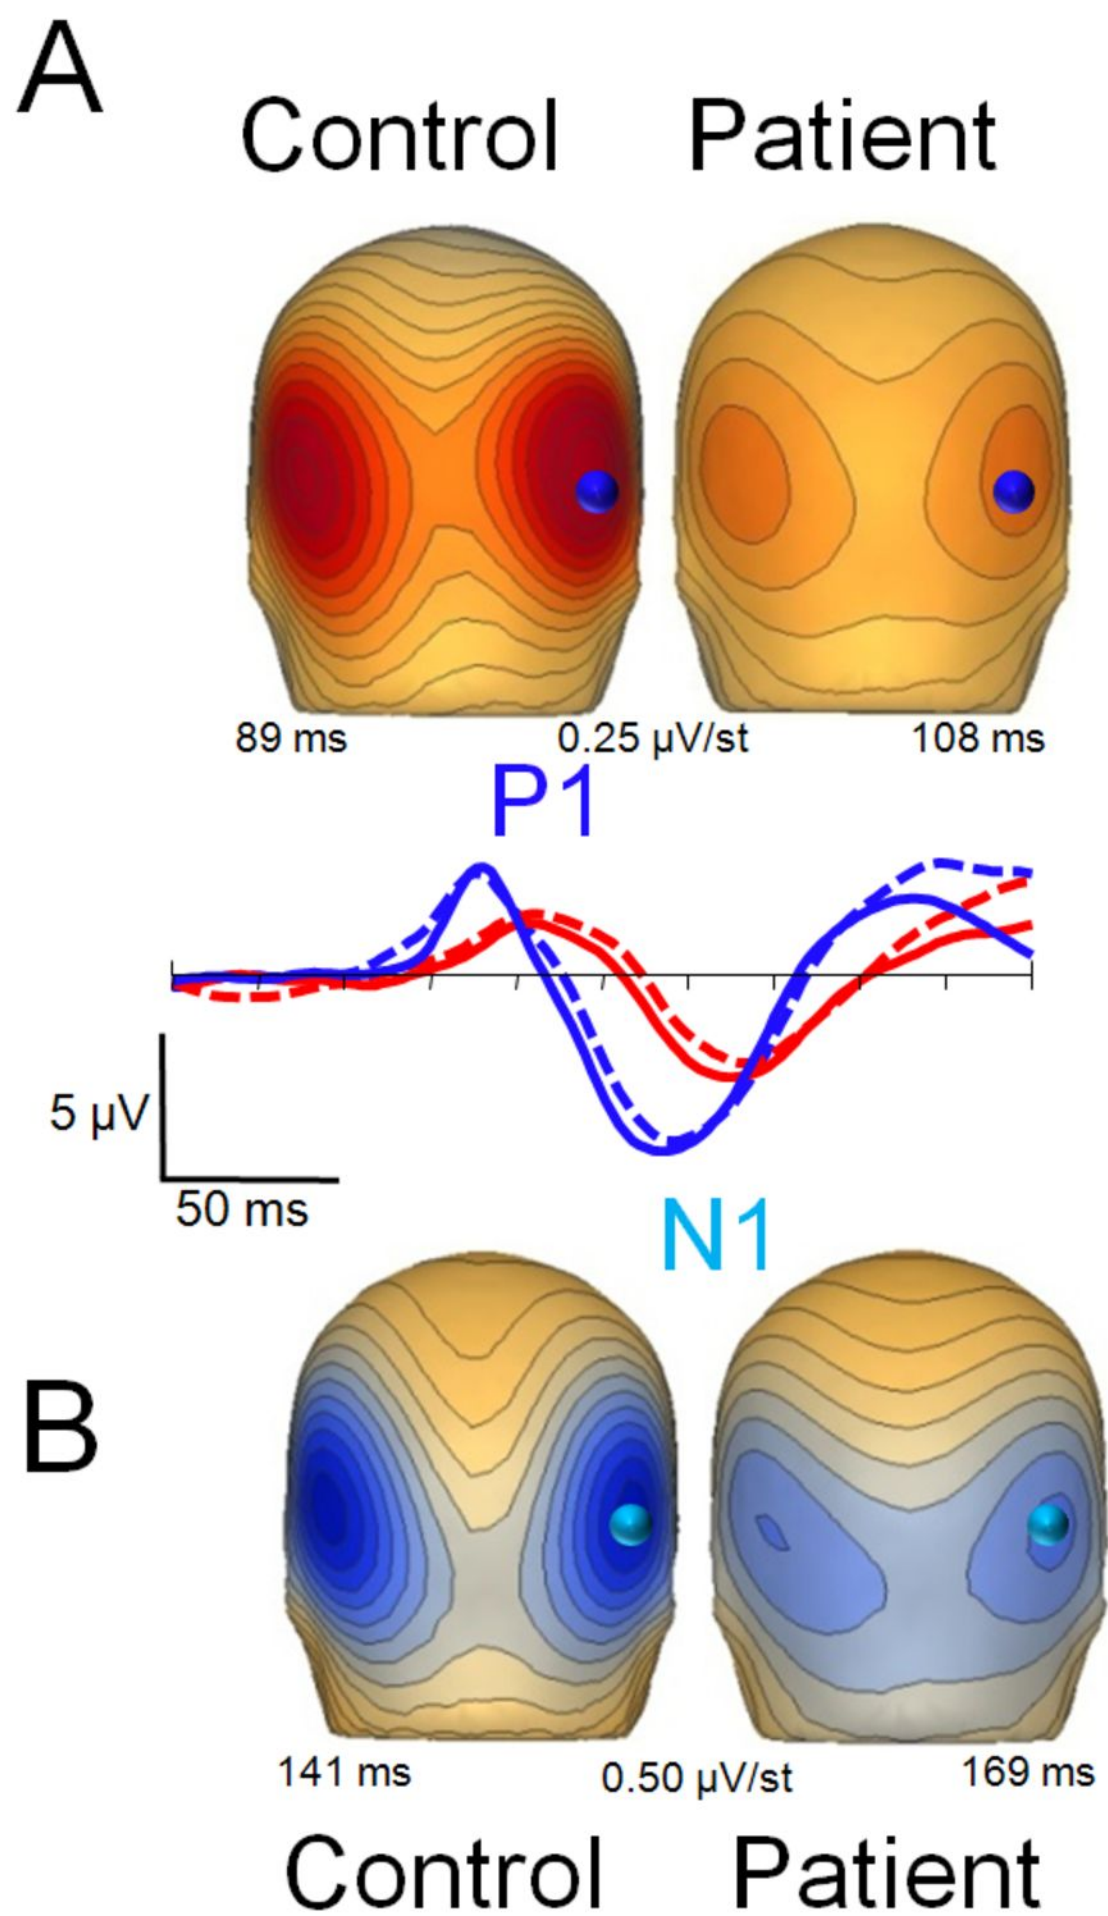

**B**

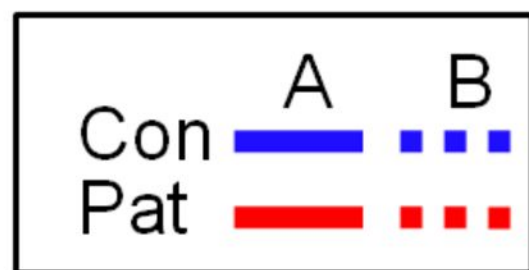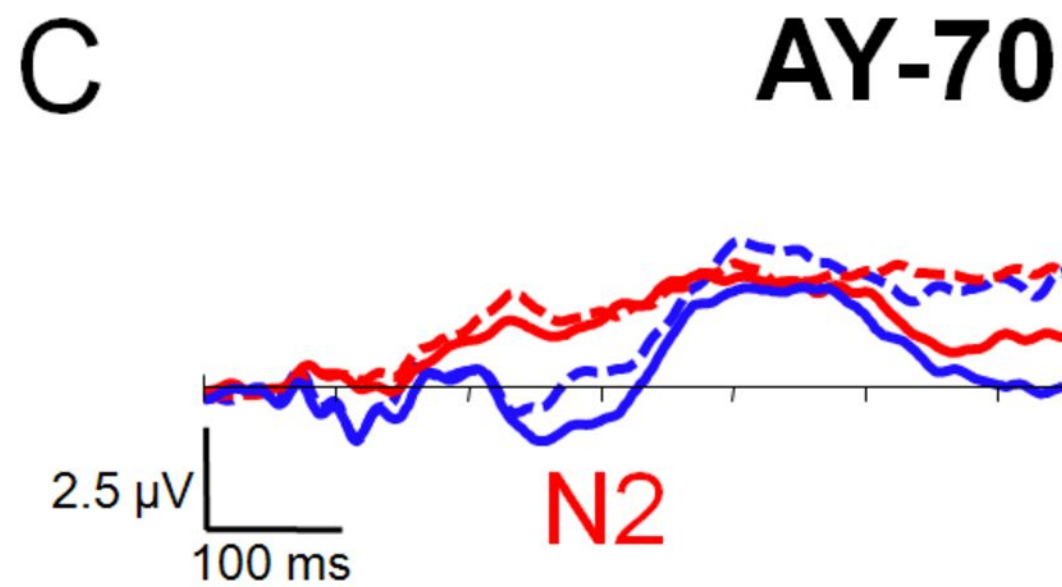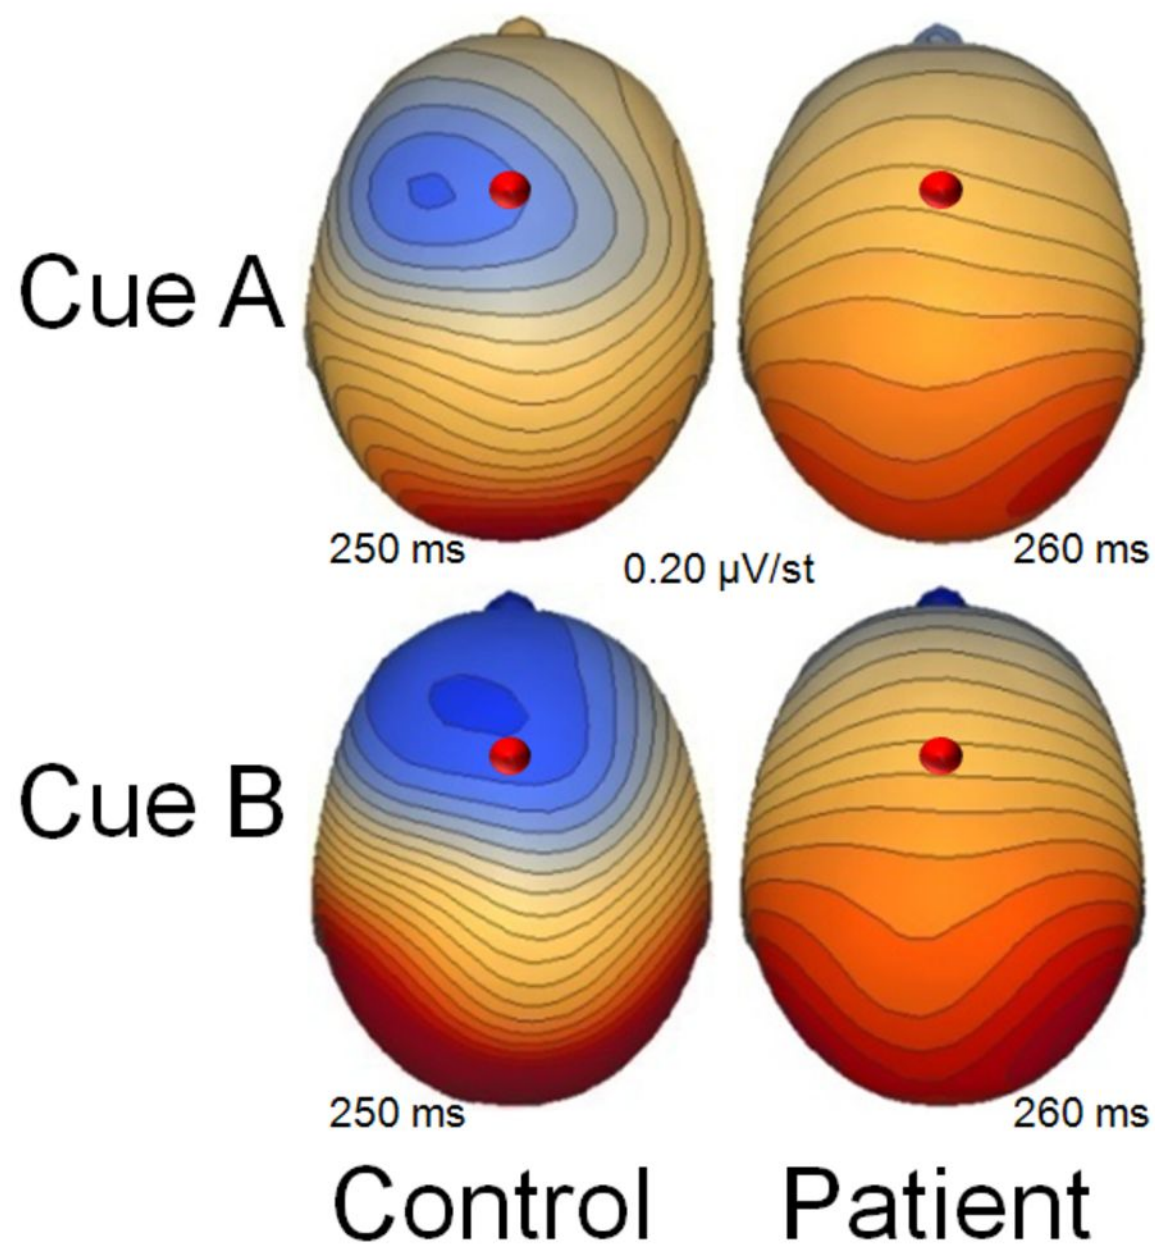

**eFigure 1**

Supplement: NIHMS515026-supplement-3-Suppl_figure_1.pdf [file NIHMS515026-supplement-3-Suppl_figure_1.pdf]

**AY-70**

Valid (X)

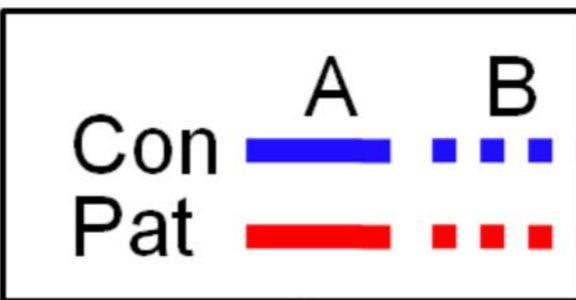

Invalid (Y)

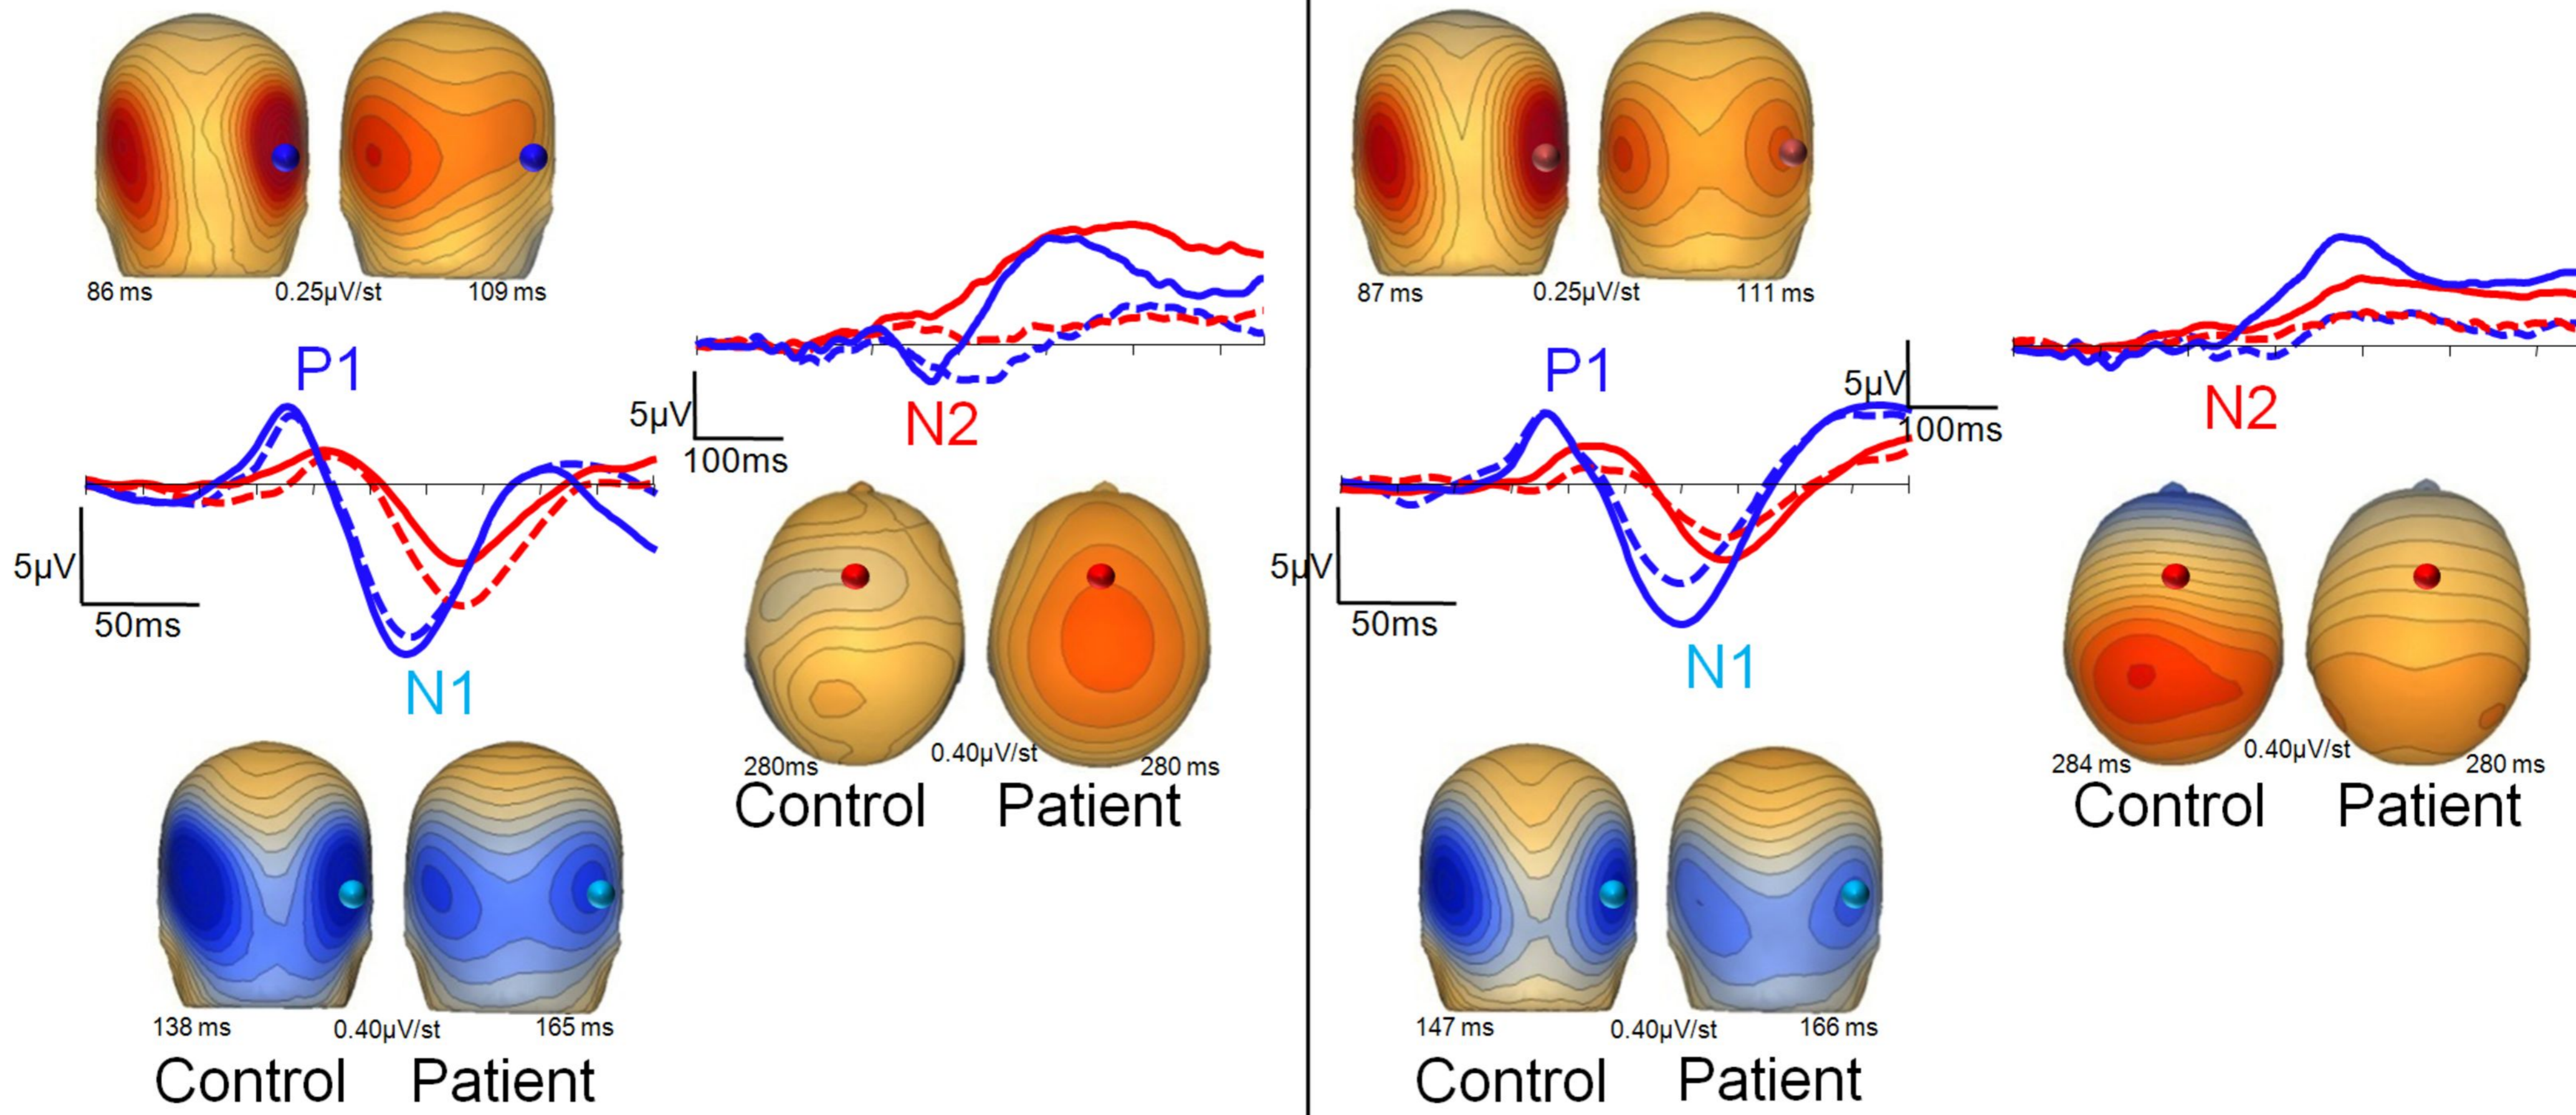

**eFigure 2**

Supplement: NIHMS515026-supplement-4-Suppl_figure_2.pdf [file NIHMS515026-supplement-4-Suppl_figure_2.pdf]

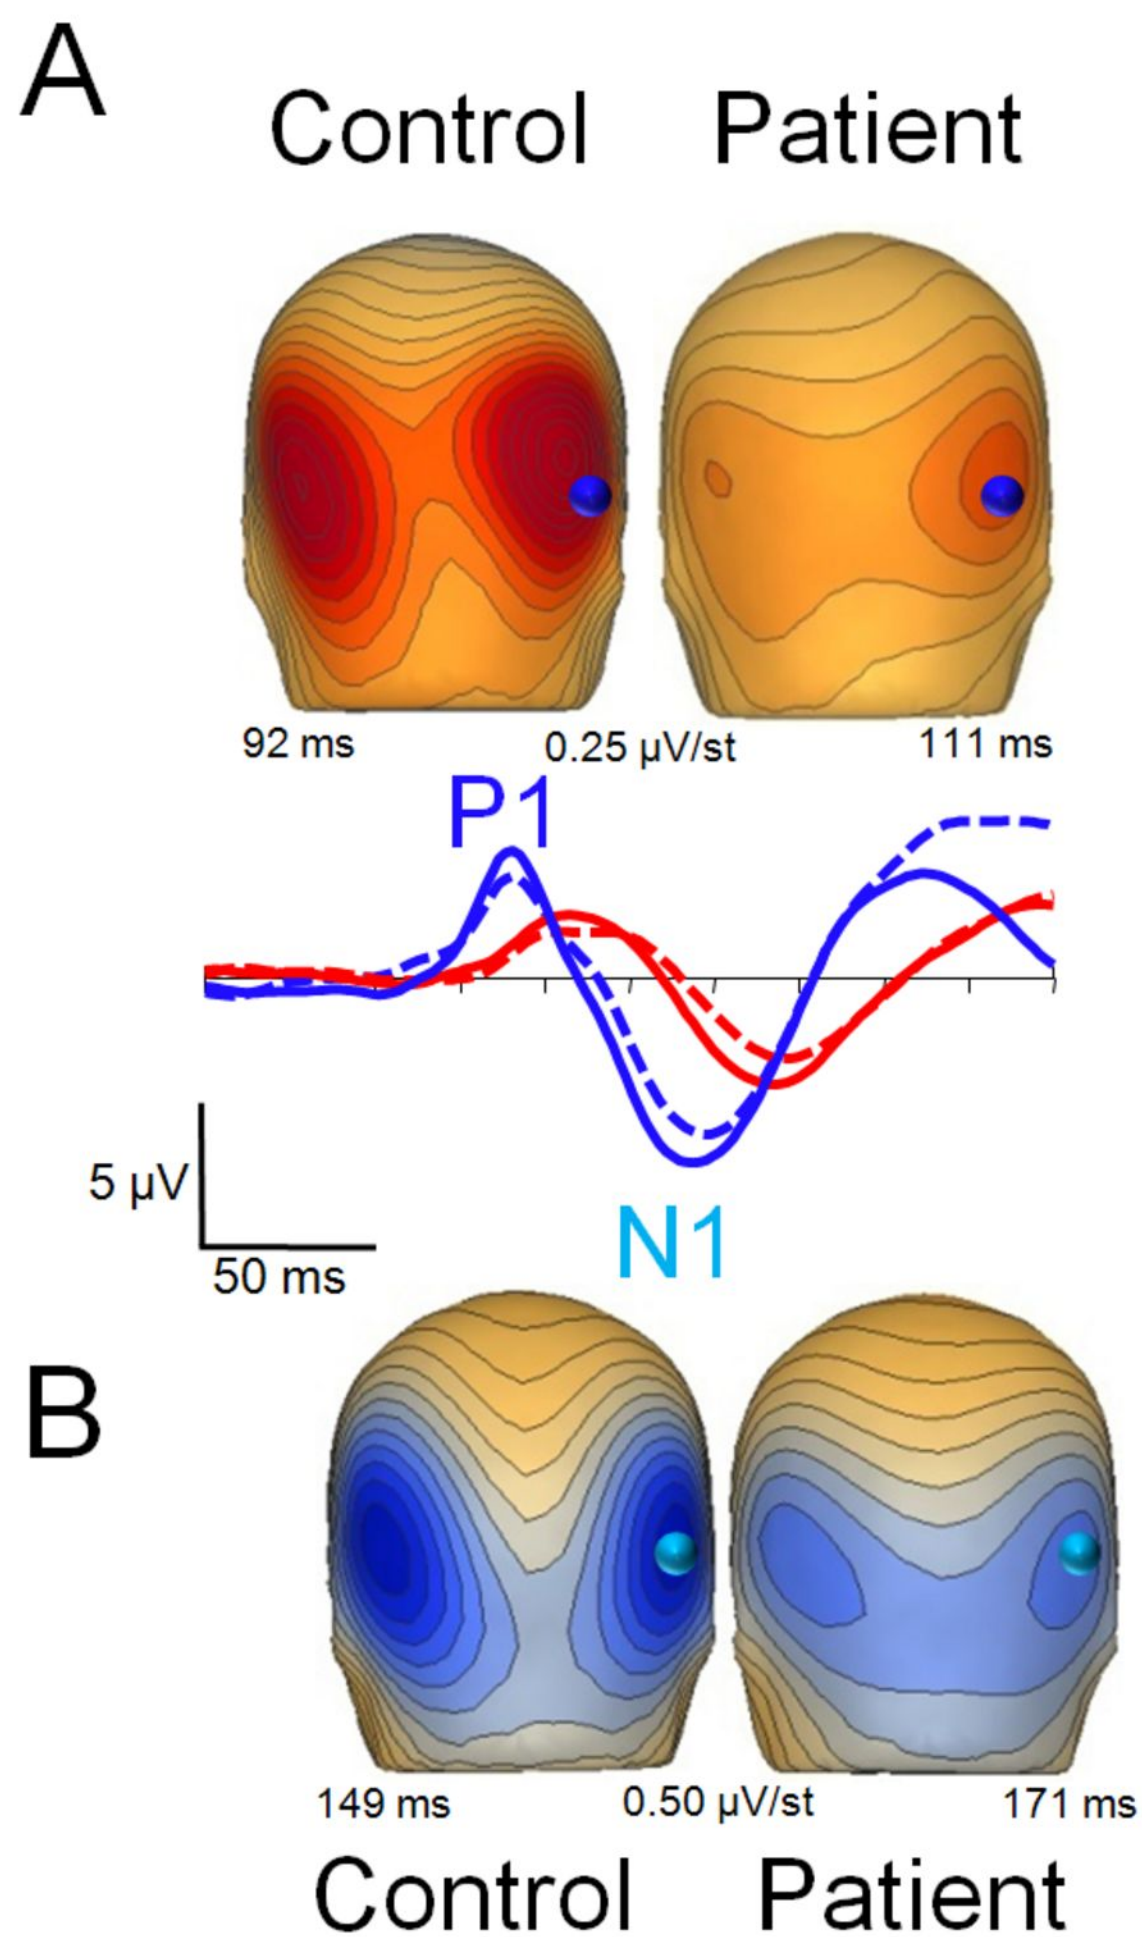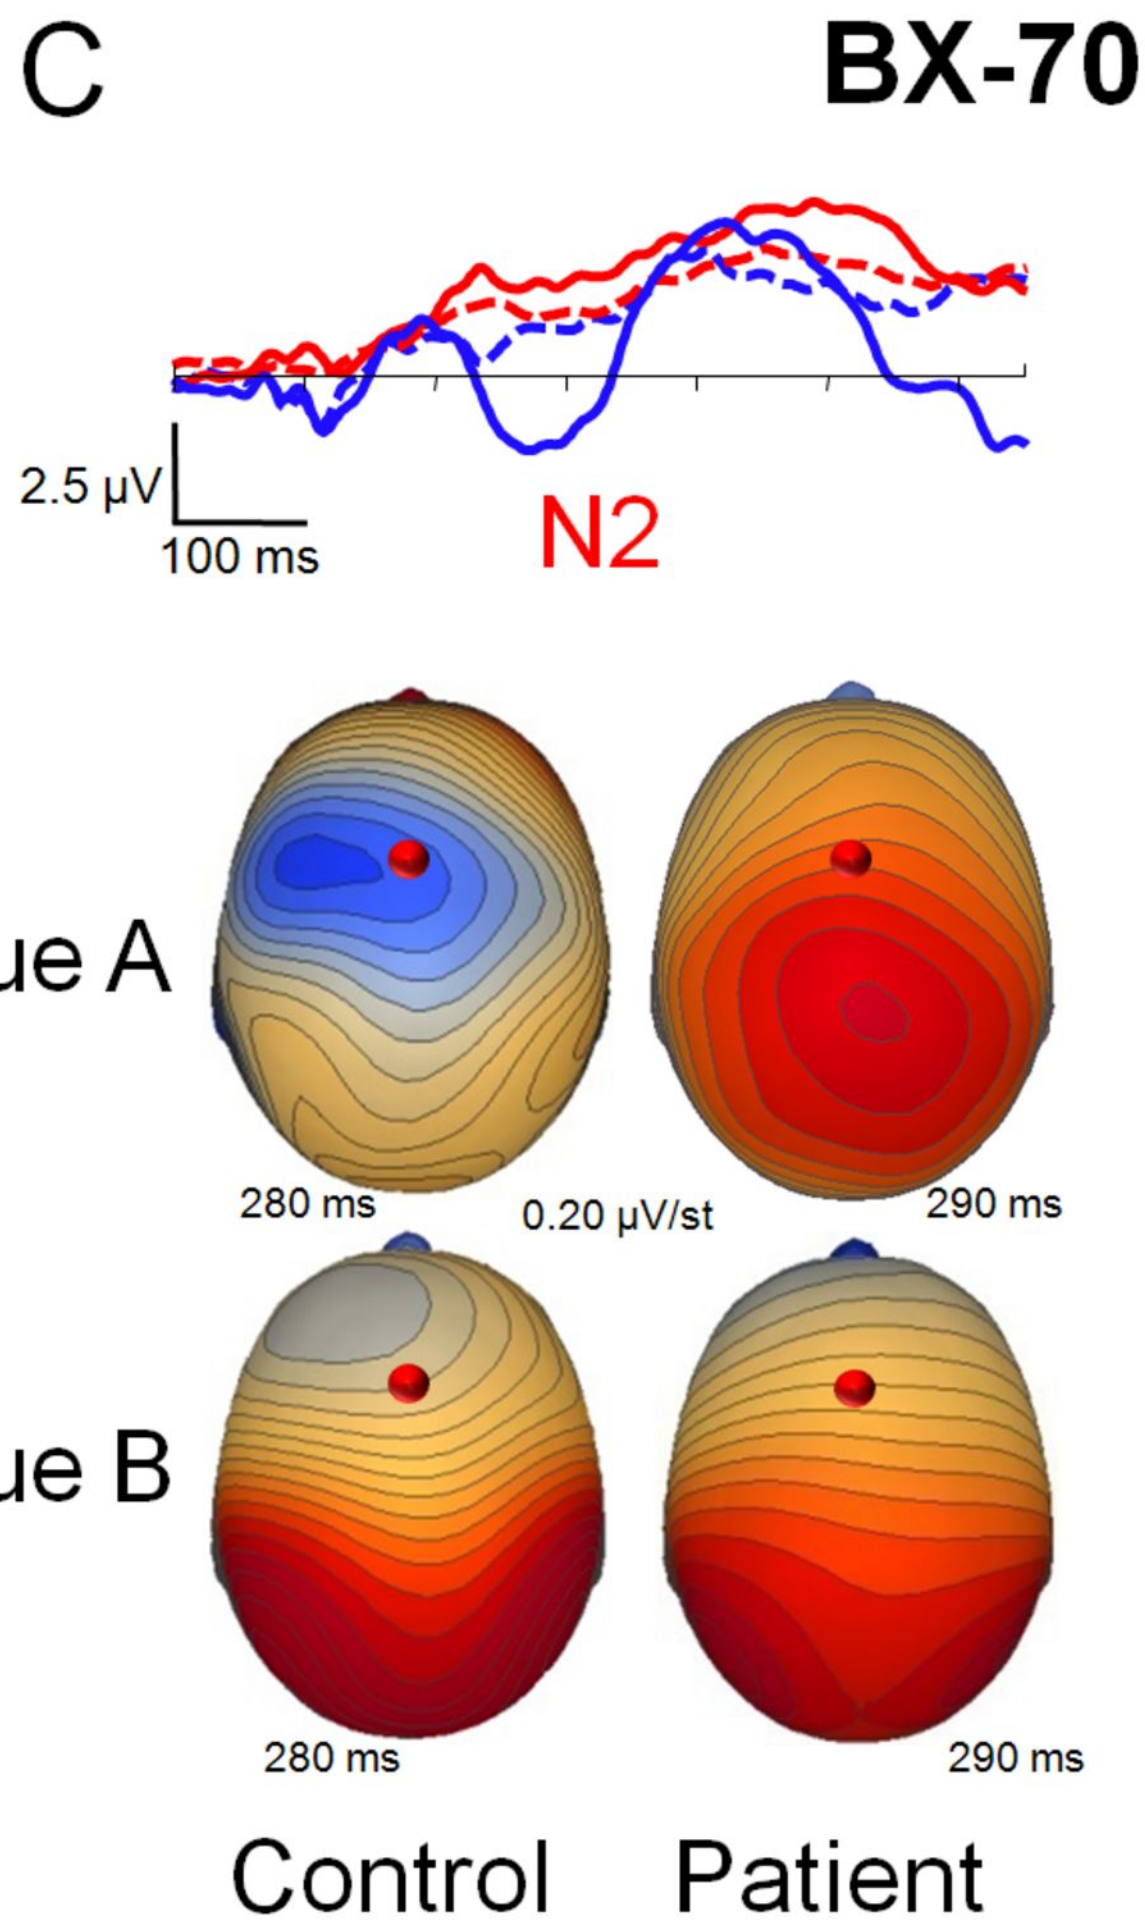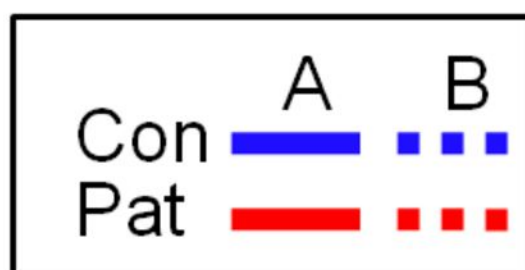

**eFigure 3**

Supplement: NIHMS515026-supplement-5-_Suppl_figure_3.pdf [file NIHMS515026-supplement-5-_Suppl_figure_3.pdf]

**BX-70**

Valid (X)

Invalid (Y)

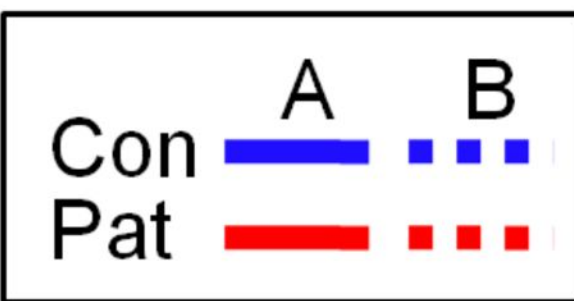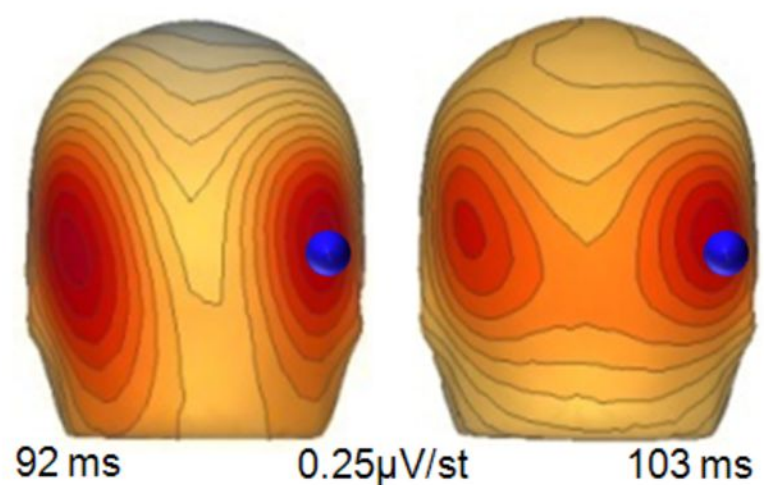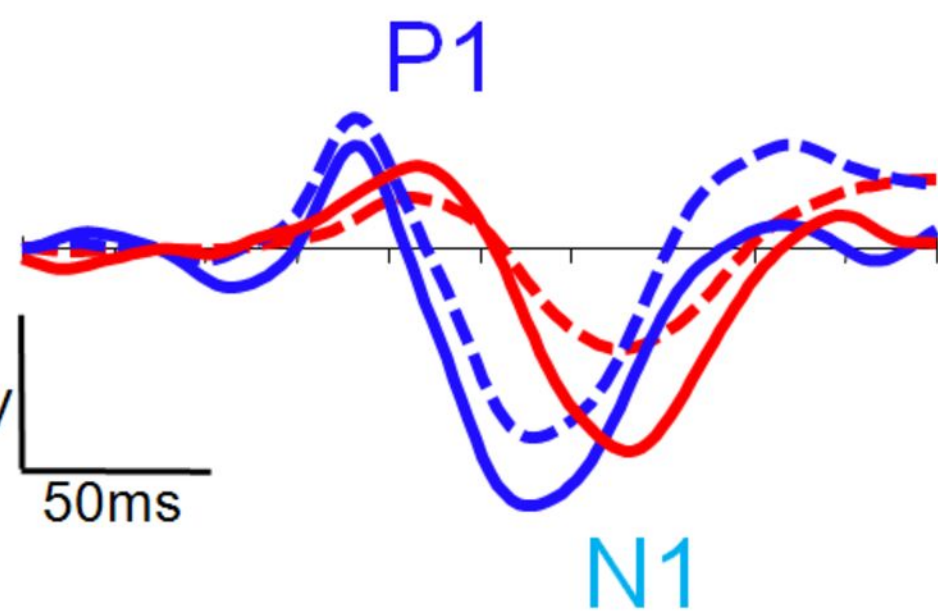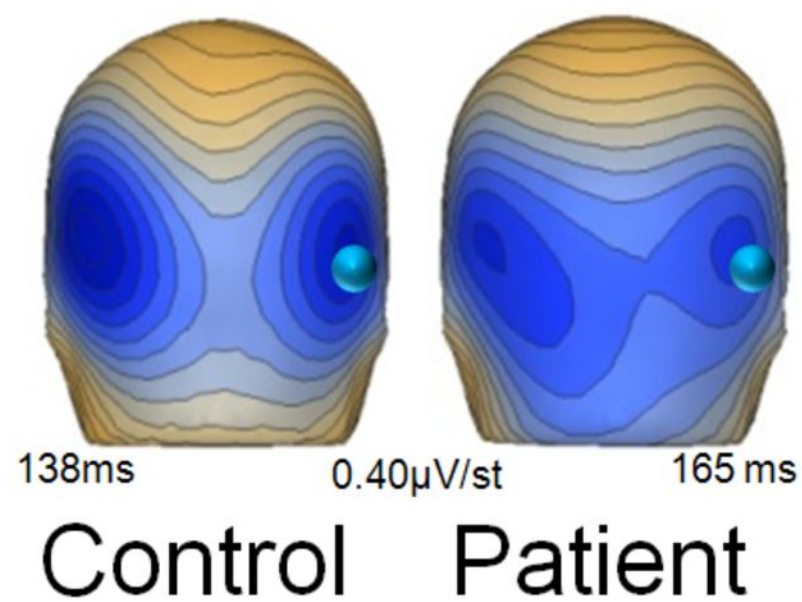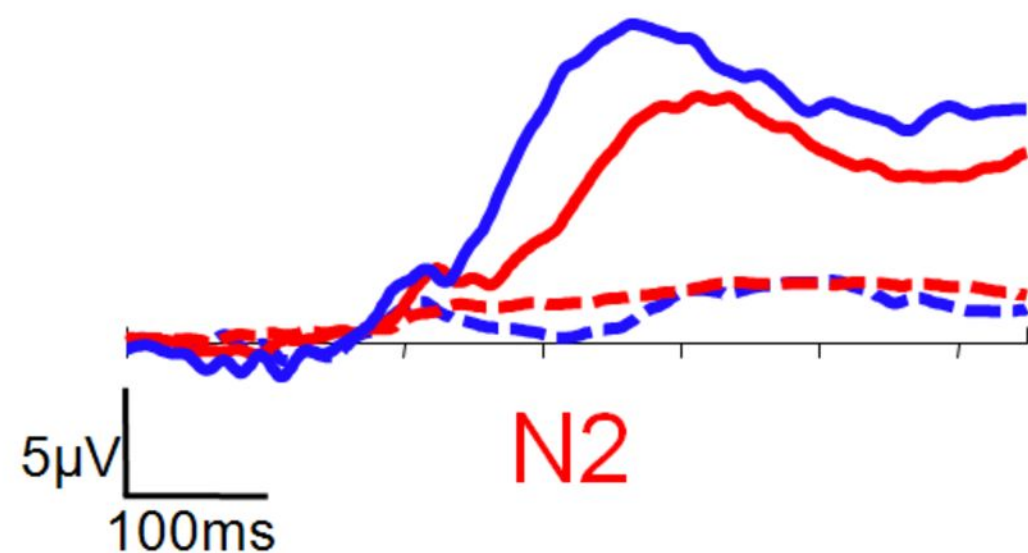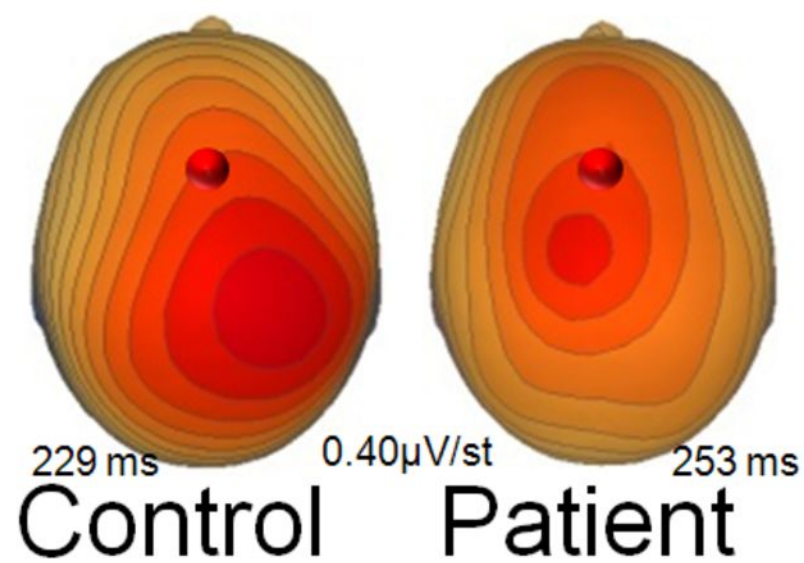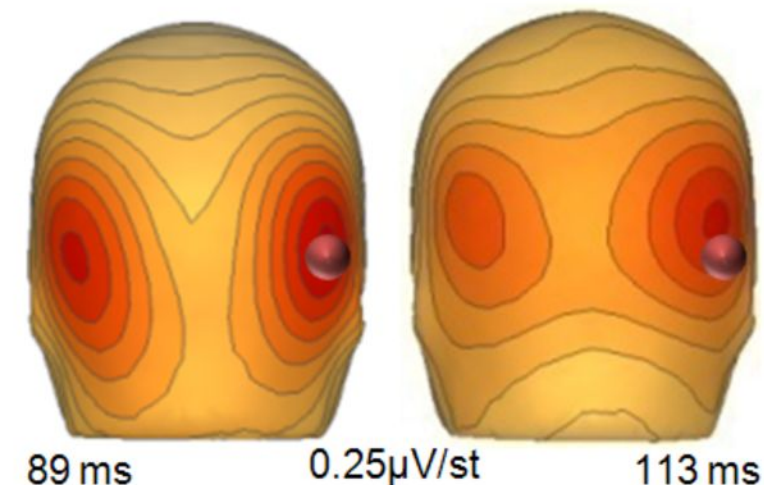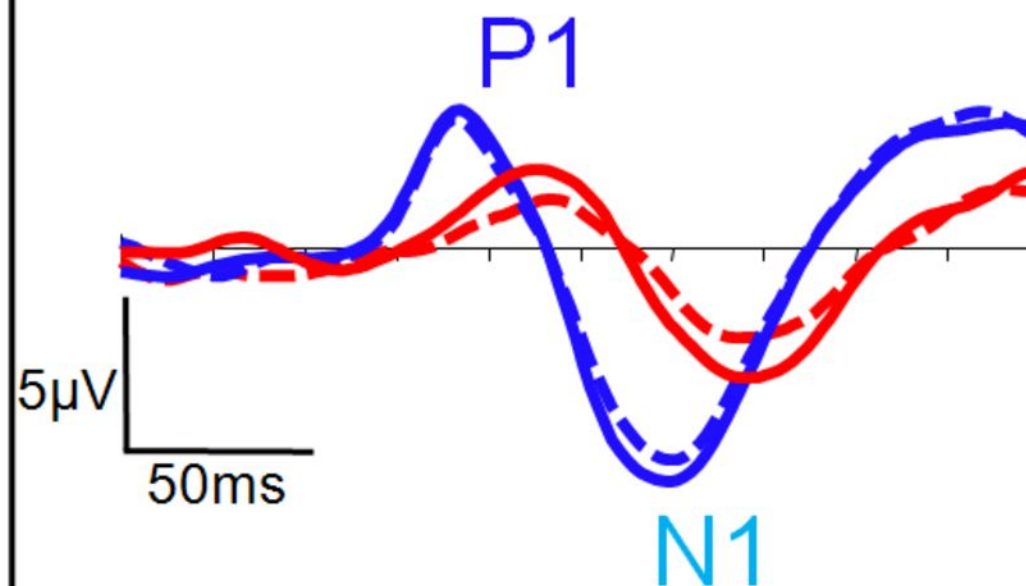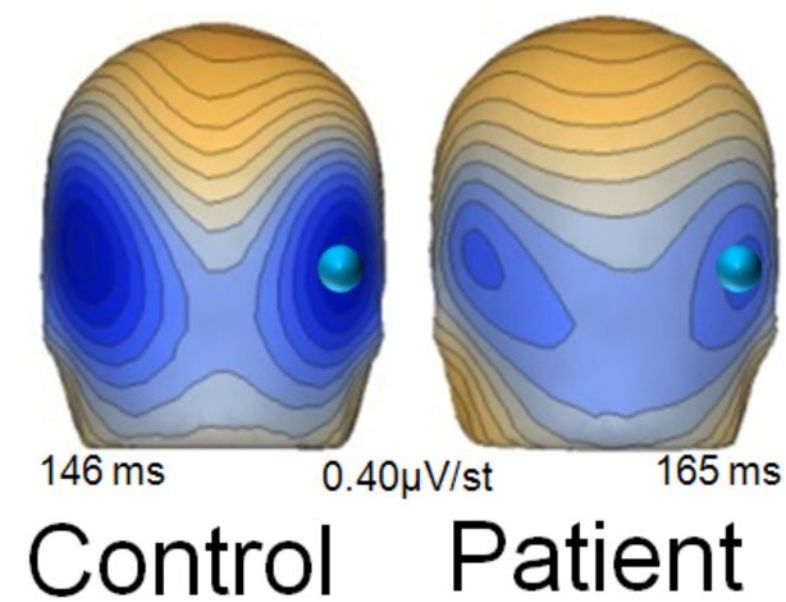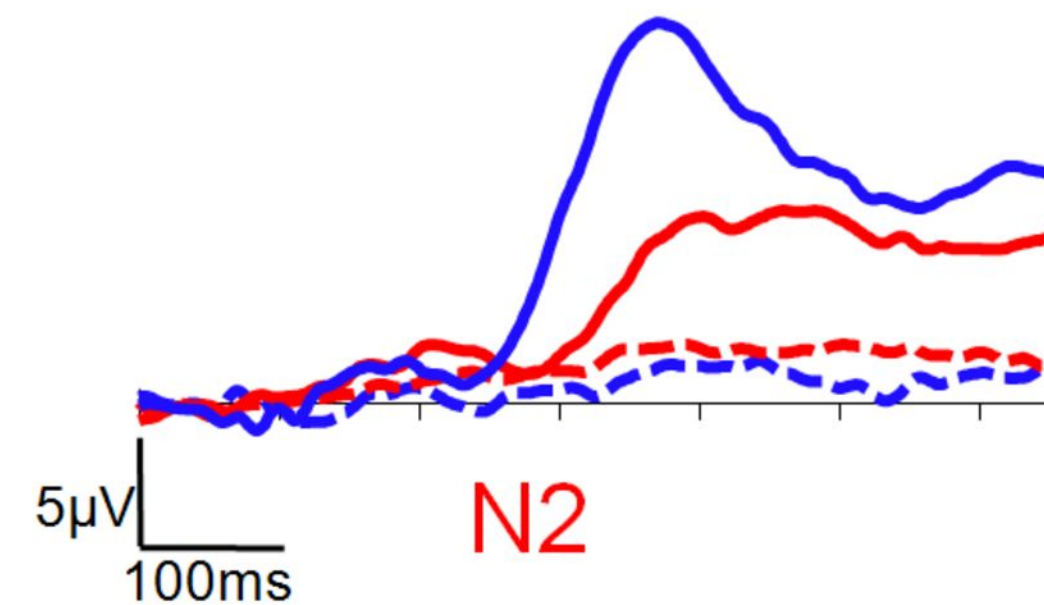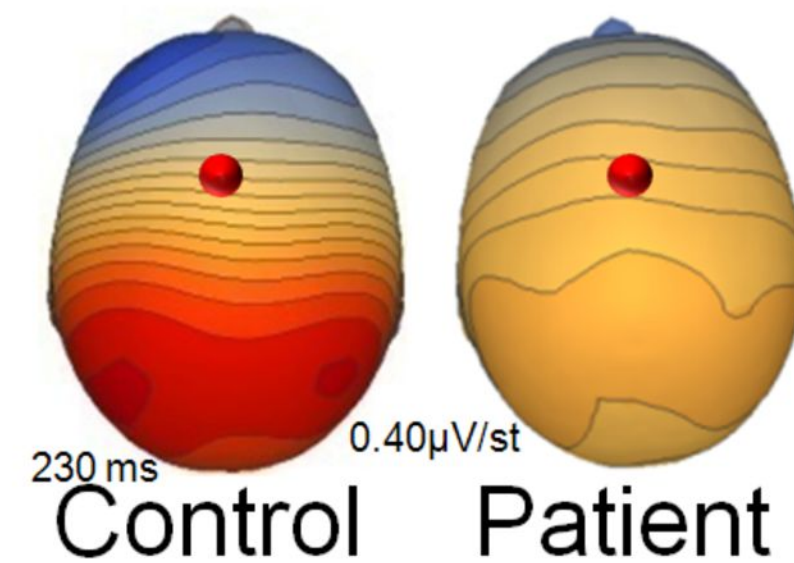

**eFigure 4**

Supplement: NIHMS515026-supplement-6-_Suppl_figure_4.pdf [file NIHMS515026-supplement-6-_Suppl_figure_4.pdf]

AX-70

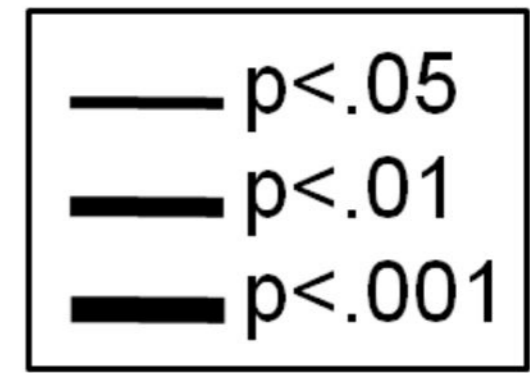

Cohort

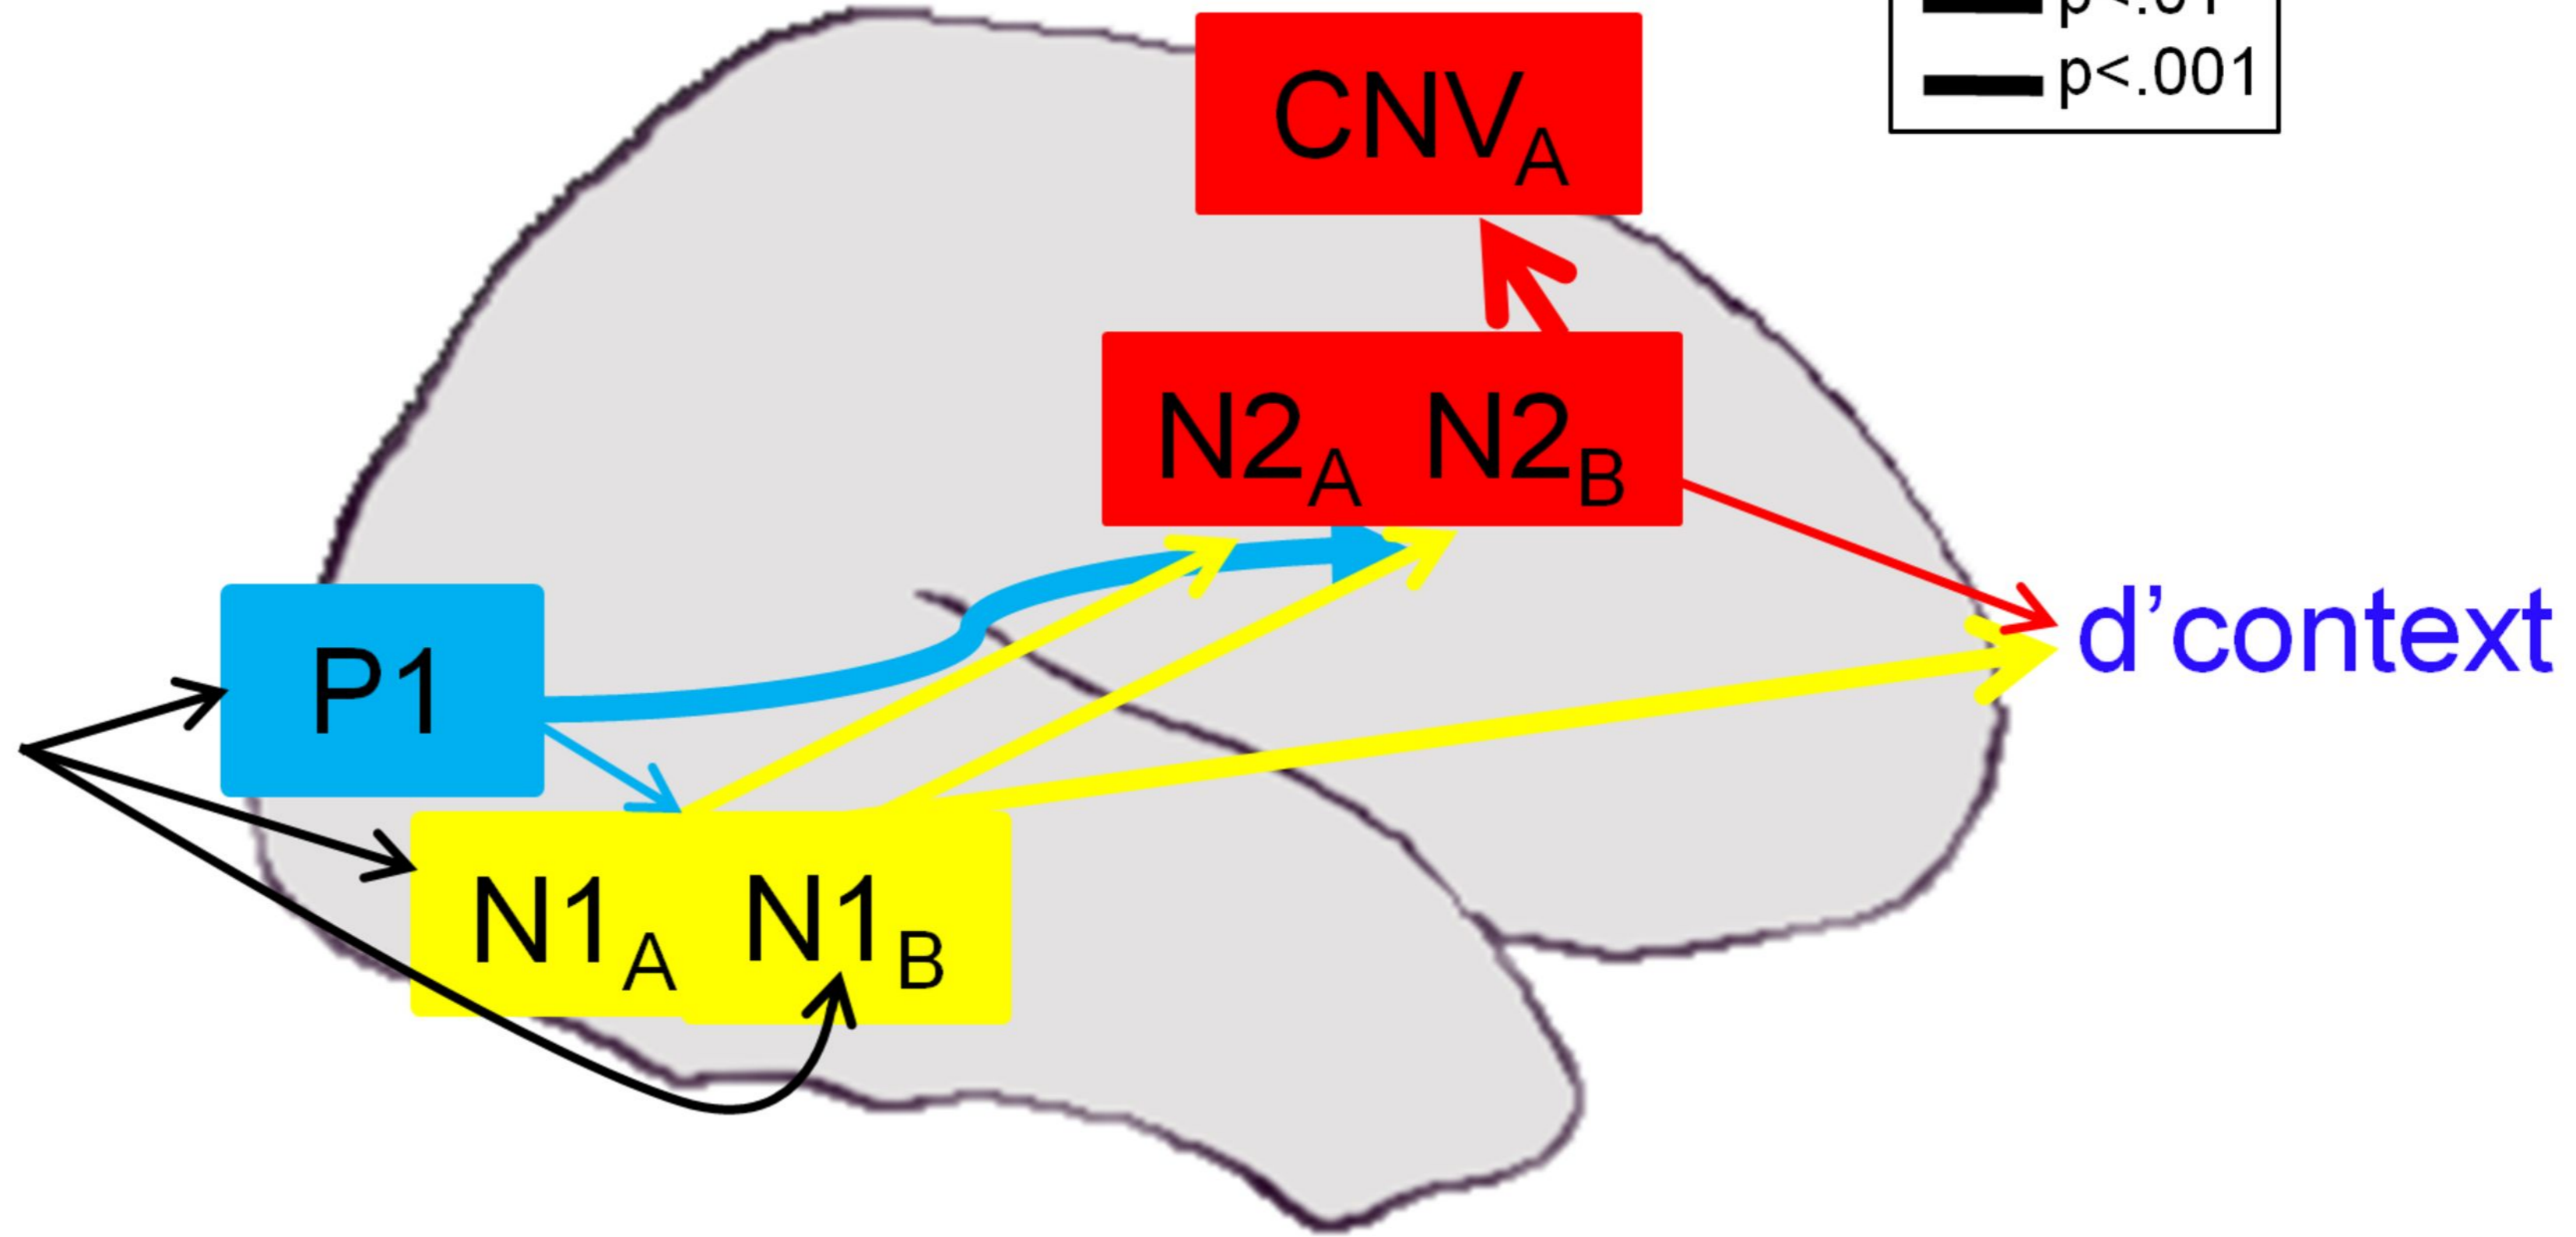

**eFigure 5**

Supplement: NIHMS515026-supplement-7-_Suppl_figure_5.pdf [file NIHMS515026-supplement-7-_Suppl_figure_5.pdf]
